# Supplementary material for: Performance of careHPV, hybrid capture 2 and visual inspection with acetic acid for detection of high-grade cervical lesion in Tanzania: A cross-sectional study
Source: PubMed Central journal article supplement (PMC6583973; doi:10.1371/journal.pone.0218559), 2019-06-19
Supplement: pone.0218559.s002.pdf [file pone.0218559.s002.pdf]

# KUZUIA KWA KINA SARATANI YA SHINGO YA KIZAZI TANZANIA

Kituo cha tafiti: ORCI

KCMC

Tarehe \_\_\_\_\_

Namba ya Mshiriki \_\_\_\_\_

Herufi za jina la mhudumu wa afya..... Herufi za jina la mshiriki.....

## TAARIFA ZA AWALI

1.

**Umri?**

\_\_\_\_\_ miaka

2. Wasifu wa ndoa:

|    |                                        |                            |
|----|----------------------------------------|----------------------------|
| 1) | Umeolewa, Ndoa ya mke mmoja            | 1 <input type="checkbox"/> |
| 2) | Ndoa ya wake zaidi ya mmoja            | 2 <input type="checkbox"/> |
| 3) | Kuishi kinyumba                        | 3 <input type="checkbox"/> |
| 4) | Sijaoa,nina mpenzi mmoja wa muda mrefu | 4 <input type="checkbox"/> |
| 5) | Sijaoa,sina mpenzi wa kudumu           | 5 <input type="checkbox"/> |
| 6) | Nimeachika/mjane                       | 6 <input type="checkbox"/> |

Je ni kwa muda gani umemjua huyo mume/mchumba/mpenzi wako?

|  miezi

|  mwaka

3. Je huwa unaishi na nani?

Mume/ mwenza

1

|                   |   |                          |
|-------------------|---|--------------------------|
| Wazazi            | 2 | <input type="checkbox"/> |
| Wakwe             | 3 | <input type="checkbox"/> |
| Ndugu wengine     | 4 | <input type="checkbox"/> |
| Marafiki          | 5 | <input type="checkbox"/> |
| Naishi peke yangu | 6 | <input type="checkbox"/> |

**4. Je umefanikiwa kufika kiwango gani cha elimu?**

|    |                                              |                          |
|----|----------------------------------------------|--------------------------|
| 1) | Bado naendelea na masomo shuleni...(fafanua) | <input type="checkbox"/> |
| 2) | Sijahudhuria shule                           | <input type="checkbox"/> |
| 3) | Darasa la 2-4                                | <input type="checkbox"/> |
| 4) | Kidato cha 1-4                               | <input type="checkbox"/> |
| 5) | Kidato cha 5-6                               | <input type="checkbox"/> |
| 6) | Elimu ya chuo kikuu                          | <input type="checkbox"/> |
| 7) | Nyinginezo.....(Taja)<br>_____               | <input type="checkbox"/> |

**5. Dini?**

|                         |   |                          |
|-------------------------|---|--------------------------|
| Mkristo                 | 1 | <input type="checkbox"/> |
| Muislam                 | 2 | <input type="checkbox"/> |
| Nyinginezo (taja) _____ | 3 | <input type="checkbox"/> |

## TAARIFA KUHUSU AFYA NA UNAVYOISHI

### 6. Je Unavuta sigara?

|                                     |                          |
|-------------------------------------|--------------------------|
| 1.Ndiyo, kila siku                  | <input type="checkbox"/> |
| 2.Ndiyo,Mara moja kwa wiki          | <input type="checkbox"/> |
| 3.Ndiyo,Zaidi ya mara moja kwa wiki | <input type="checkbox"/> |
| 4.Hapana, Ila nilivuta zamani       | <input type="checkbox"/> |
| 5.Hapana, → (ruka hadi swali la 11) | <input type="checkbox"/> |

7.

**Uianza kuvuta sigara ukiwa na Umri gani ?**

(i.e angalau 1 kwa wiki). Miaka \_\_\_\_\_

8.

**Ni kwa miaka mingapi umekuwa ukivuta sigara? (toa miaka aliyokuwa havuti)  
Idadi kwa miaka: \_\_\_\_\_**

9.

**Kama bado unavuta je ni ngapi unavuta kwa siku?  
Idadi unayovuta kwa siku: \_\_\_\_\_**

10.

**Kama umeacha kuvuta sigara?ni lini uliacha kuvuta sigara?**

Umri \_\_\_\_\_ miaka?

11. Ulishawahi kunywa pombe? Kama ndiyo ulianza kunywa pombe ukiwa na miaka mingapi?

(Check only one)

| Sijawahi                                                    | Nikiwa na miaka 12                    | Nikiwa na miaka 13-14                 | Nikiwa na miaka 15-16                 | Nikiwa na miaka 17-18                 | Nikiwa na miaka 19-20                 | Nikiwa na miaka 21                    |
|-------------------------------------------------------------|---------------------------------------|---------------------------------------|---------------------------------------|---------------------------------------|---------------------------------------|---------------------------------------|
| <input type="checkbox"/> <sub>1</sub><br>Ruka hadi swali 14 | <input type="checkbox"/> <sub>2</sub> | <input type="checkbox"/> <sub>3</sub> | <input type="checkbox"/> <sub>4</sub> | <input type="checkbox"/> <sub>5</sub> | <input type="checkbox"/> <sub>6</sub> | <input type="checkbox"/> <sub>7</sub> |

12. Je unakunywa kiasi gani kwa wiki kwa pombe zifuatavyo?

|            |                                     |                      |
|------------|-------------------------------------|----------------------|
| Bia        | Na ya glassi kwa wiki               | <input type="text"/> |
| Mvinyo     | Wastani wa idadi ya glassi kwa wiki | <input type="text"/> |
| Pombe kali | Wastani wa idadi ya glass kwa wiki  | <input type="text"/> |

1 chupa ya mvinyo = 6 glasi, 1 chupa pombe kali = 20 vipimo, 1 chupa ya bia = 2 glasi )

13. Mara ngapi kwa mwezi umewahi kunywa zaidi ya mara sita kwa wakati mmoja?

(Check only one)

| Sijawahi                              | Chini ya mwezi                        | 1-3 kwa mwezi                         | 4-8 kwa mwezi                         | ≥ 9 kwa mwezi                         |
|---------------------------------------|---------------------------------------|---------------------------------------|---------------------------------------|---------------------------------------|
| <input type="checkbox"/> <sub>1</sub> | <input type="checkbox"/> <sub>2</sub> | <input type="checkbox"/> <sub>3</sub> | <input type="checkbox"/> <sub>4</sub> | <input type="checkbox"/> <sub>5</sub> |

14. Unaionaje afya yako?

| Excellent                             | Very good                             | Good                                  | Less good                             | Bad                                   |
|---------------------------------------|---------------------------------------|---------------------------------------|---------------------------------------|---------------------------------------|
| <input type="checkbox"/> <sub>1</sub> | <input type="checkbox"/> <sub>2</sub> | <input type="checkbox"/> <sub>3</sub> | <input type="checkbox"/> <sub>4</sub> | <input type="checkbox"/> <sub>5</sub> |

15. Unauonaje ukubwa wa mwili wako?

| Mnene sana                            | Mnene kiasi                           | Mzuri                                 | Mwembamba kiasi                       | Mwembamba sana                        |
|---------------------------------------|---------------------------------------|---------------------------------------|---------------------------------------|---------------------------------------|
| <input type="checkbox"/> <sub>1</sub> | <input type="checkbox"/> <sub>2</sub> | <input type="checkbox"/> <sub>3</sub> | <input type="checkbox"/> <sub>4</sub> | <input type="checkbox"/> <sub>5</sub> |

AFYA YA UZAZI NA MAHUSIANO

16. Je Umeshawahi kupata ujauzito?

|          |   |                                                |
|----------|---|------------------------------------------------|
| - Ndiyo  | 1 | <input type="checkbox"/>                       |
| - Hapana | 2 | <input type="checkbox"/> Ruka hadi swali la 17 |

Kama ndiyo

|                 |   |                          |
|-----------------|---|--------------------------|
| Idadi ya mimba  | 1 | <input type="checkbox"/> |
| Idadi ya watoto | 2 | <input type="checkbox"/> |

Je ulikuwa na umri gani ulipopata ujauzito kwa mara ya kwanza?

Je ulikuwa na umri gani ilipojifungua motto wako wa kwanza?

17. Je umeshawahi kuwa na mpenzi/mwenza?

|          |   |                                                |
|----------|---|------------------------------------------------|
| - Ndiyo  | 1 | <input type="checkbox"/>                       |
| - Hapana | 2 | <input type="checkbox"/> Ruka hadi swali la 21 |

Kama ndiyo

Ulikuwa na umri gani ulipojamiiana/kufanya mapenzi kwa mara ya kwanza?

Mpenzi/mwenza wako alikuwa na umri gani wakati huo?

18. Je kwa kipindi cha maisha yako yote umewahi kuwa na wapenzi wangapi?

19. Kwenye kipindi cha miezi 12 (mwaka) iliyopita umewahi kufanya mapenzi/kujamiiana?

|          |   |                          |
|----------|---|--------------------------|
| - Ndiyo  | 1 | <input type="checkbox"/> |
| - Hapana | 2 | <input type="checkbox"/> |

**Kama ndiyo**

Ni mara ngapi umewahi kutumia kondomu ?

|                                    |   |                          |
|------------------------------------|---|--------------------------|
| Kila wakati wa tendo la ndoa       | 1 | <input type="checkbox"/> |
| Mara nyingi lakini sio kila wakati | 2 | <input type="checkbox"/> |
| Mara chache                        | 3 | <input type="checkbox"/> |
| Situmii                            | 4 | <input type="checkbox"/> |

20. Je mume/mwenza wako ametahiriwa?

|                  |   |                          |
|------------------|---|--------------------------|
| Ndiyo            | 1 | <input type="checkbox"/> |
| <u>Hapana</u>    | 2 | <input type="checkbox"/> |
| Sina mume/mwenza | 3 | <input type="checkbox"/> |

21. Je daktari au mhudumu wa afya amewahi kukueleza kuwa una viotea/vinyama (genital warts) sehemu za siri?

|          |   |                          |
|----------|---|--------------------------|
| - Ndiyo  | 1 | <input type="checkbox"/> |
| - Hapana | 2 | <input type="checkbox"/> |

**Kama ndiyo**

Ulikuwa na umri gani ulipoambiwa kwa mara ya kwanza?

|  |
|--|
|  |
|--|

Je umeshapatwa na viotea/vinyama (genital warts) sehemu za siri kwenye cha miezi 12 (mwaka) iliyopita?

|          |   |                          |
|----------|---|--------------------------|
| - Ndiyo  | 1 | <input type="checkbox"/> |
| - Hapana | 2 | <input type="checkbox"/> |

22. Je daktari au muhudumu wa afya amewahi kukueleza kuwa unaviashiria vya awali vya saratani ya shingo ya kizazi?

|          |   |                          |
|----------|---|--------------------------|
| - Ndiyo  | 1 | <input type="checkbox"/> |
| - Hapana | 2 | <input type="checkbox"/> |

**Kama ndiyo**

Ni lini uligundulika kuwa na viashiria vya awali vya saratani?

Mwezi

Mwaka

**Ulipewa matibabu gani?**

|              |   |                          |
|--------------|---|--------------------------|
| Cryo therapy | 1 | <input type="checkbox"/> |
| <u>LEEP</u>  | 2 | <input type="checkbox"/> |
| Sijui        | 3 | <input type="checkbox"/> |

23. Je daktari au muhudumu wa afya amewahi kukueleza kuwa una magonjwa yanayoambukizwa kwa njia ya kujamiiana kati haya?

|                  |                            |     |                            |    |                   |                                                         |
|------------------|----------------------------|-----|----------------------------|----|-------------------|---------------------------------------------------------|
| <b>Chlamydia</b> | 1 <input type="checkbox"/> | Yes | 2 <input type="checkbox"/> | No | <b>Kama ndiyo</b> | <b>Umri ulipoupata kwa mara ya kwanza (miaka)</b> _____ |
| <b>Gonorrhea</b> | 1 <input type="checkbox"/> | Yes | 2 <input type="checkbox"/> | No | <b>Kama ndiyo</b> | <b>Umri ulipoupata kwa mara ya kwanza (miaka)</b> _____ |
| <b>Syphilis</b>  | 1 <input type="checkbox"/> | Yes | 2 <input type="checkbox"/> | No | <b>Kama ndiyo</b> | <b>Umri ulipoupata kwa mara ya kwanza (miaka)</b> _____ |

24. Je umewahi kupima virusi vya ukimwi (VVU)?

|          |   |                          |
|----------|---|--------------------------|
| - Ndiyo  | 1 | <input type="checkbox"/> |
| - Hapana | 2 | <input type="checkbox"/> |

**Kama ndiyo**

**Je ulikutwa na maambukizi ya VVU?**

|          |   |                          |
|----------|---|--------------------------|
| - Ndiyo  | 1 | <input type="checkbox"/> |
| - Hapana | 2 | <input type="checkbox"/> |

**Kama ndiyo ni lini uligundulika kuwa na VVU?** Mwezi  |  mwaka  |

**Mara ya mwisho ulipima CD4 lini?** Mwezi  |  mwaka  |

(Kama ni Zaidi ya miezi 6 —————> akapime tena)

**Majibu ya CD4?** \_\_\_\_\_

**Je umeshaanza kutumia ARV?**

|                    |                                  |                                   |                   |                                                      |                                                      |
|--------------------|----------------------------------|-----------------------------------|-------------------|------------------------------------------------------|------------------------------------------------------|
| <b>First line</b>  | Ndiyo 1 <input type="checkbox"/> | Hapana 2 <input type="checkbox"/> | <b>Kama ndiyo</b> | <input type="text"/>   <input type="text"/><br>Mwezi | <input type="text"/>   <input type="text"/><br>Mwaka |
| <b>Second line</b> | Ndiyo 1 <input type="checkbox"/> | Hapana 2 <input type="checkbox"/> | <b>Kama ndiyo</b> | <input type="text"/>   <input type="text"/><br>Mwezi | <input type="text"/>   <input type="text"/><br>Mwezi |
| <b>Third line</b>  | Ndiyo 1 <input type="checkbox"/> | Hapana 2 <input type="checkbox"/> | <b>Kama ndiyo</b> | <input type="text"/>   <input type="text"/><br>Mwezi | <input type="text"/>   <input type="text"/><br>Mwezi |

**Naomba unitajie namba ya kadi yako ya CTC.** \_\_\_\_\_  
Jina la kliniki
Namba ya Kadi

**Kama hauifahamu, je naweza kukupigia simu ili unitajie namba ya kadi ya CTC?**

|          |   |                          |
|----------|---|--------------------------|
| - Ndiyo  | 1 | <input type="checkbox"/> |
| - Hapana | 2 | <input type="checkbox"/> |



**TAARIFA KUHUSU SARATANI YA SHINGO YA KIZAZI**

**25. Sentensi zifuatazo zinahusu saratani ya shingo ya kizazi. Sema kweli au si kweli kwa kila sentensi**

|                                                                                                                         |                                       |                                          |
|-------------------------------------------------------------------------------------------------------------------------|---------------------------------------|------------------------------------------|
| <b>Malaria (mbu) inasababisha saratani ya shingo ya kizazi</b>                                                          | <b>Kweli</b> <input type="checkbox"/> | <b>Si kweli</b> <input type="checkbox"/> |
| <b>Kupata maumivu wakati wa kukojoa ni dalili ya saratani ya shingo ya kizazi</b>                                       | <b>Kweli</b> <input type="checkbox"/> | <b>Si kweli</b> <input type="checkbox"/> |
| <b>Saratani ya shingo ya kizazi ndiyo inayoongoza kwa magonjwa ya kanza za wanawake hapa Tanzania</b>                   | <b>Kweli</b> <input type="checkbox"/> | <b>Si kweli</b> <input type="checkbox"/> |
| <b>Unaweza kupata saratani ya shingo ya kizazi kwa kubusiana</b>                                                        | <b>Kweli</b> <input type="checkbox"/> | <b>Si kweli</b> <input type="checkbox"/> |
| <b>Inawezekana kujikinga na saratani ya shingo ya kizazi</b>                                                            | <b>Kweli</b> <input type="checkbox"/> | <b>Si kweli</b> <input type="checkbox"/> |
| <b>Kutokwa damu ukeni ni dalili kuu ya ugonjwa wa saratani ya shingo ya kizazi</b>                                      | <b>Kweli</b> <input type="checkbox"/> | <b>Si kweli</b> <input type="checkbox"/> |
| <b>Jua kali linaweza kusababisha saratani ya shingo ya kizazi</b>                                                       | <b>Kweli</b> <input type="checkbox"/> | <b>Si kweli</b> <input type="checkbox"/> |
| <b>Maambukizi ya kwenye shingo ya kizazi mara zote hubadilika kuwa saratani</b>                                         | <b>Kweli</b> <input type="checkbox"/> | <b>Si kweli</b> <input type="checkbox"/> |
| <b>Wanawake wenye VVU wako kwenye hatari kubwa ya kupata saratani ya shingo ya kizazi</b>                               | <b>Kweli</b> <input type="checkbox"/> | <b>Si kweli</b> <input type="checkbox"/> |
| <b>Saratani ya shingo ya kizazi mara nyingi hugundulika mapema kutokana na dalili zake</b>                              | <b>Kweli</b> <input type="checkbox"/> | <b>Si kweli</b> <input type="checkbox"/> |
| <b>Unaweza kupata saratani ya shingo ya kizazi kwa kujamiiana bila kinga</b>                                            | <b>Kweli</b> <input type="checkbox"/> | <b>Si kweli</b> <input type="checkbox"/> |
| <b>Kupima afya kunaweza kugundua maambukizi ya kwenye shingo ya kizazi na kuyazuia yasibalike kuwa saratani</b>         | <b>Kweli</b> <input type="checkbox"/> | <b>Si kweli</b> <input type="checkbox"/> |
| <b>Saratani ya shingo ya kizazi inaongoza kwa kusababisha vifo vinavyotokana na saratani kwa wanawake hapa Tanzania</b> | <b>Kweli</b> <input type="checkbox"/> | <b>Si kweli</b> <input type="checkbox"/> |
| <b>Saratani ya shingo ya kizazi mara nyingi huwapata wanawake wakiwa kwenye miaka ya ishirini.</b>                      | <b>Kweli</b> <input type="checkbox"/> | <b>Si kweli</b> <input type="checkbox"/> |
| <b>Kuwashwa ukeni kunaweza kuwa ni dalili ya saratani ya shingo ya kizazi</b>                                           | <b>Kweli</b> <input type="checkbox"/> | <b>Si kweli</b> <input type="checkbox"/> |
| <b>Kirusi kinachoitwa Human papilloma virus ndicho kisababishacho saratani ya shingo ya kizazi</b>                      | <b>Kweli</b> <input type="checkbox"/> | <b>Si kweli</b> <input type="checkbox"/> |

## UKUBALI WA UJUMBE MFUPI KUPITIA SIMU YA MKONONI

### UTANGULIZI

Wanawake wenye viashiria vya awali vya saratani ya shingo ya kizazi huwa wanaombwa kurudi tena kliniki baada ya miezi 12. Kwenye utafiti huu baadhi ya wanawake watapote ujumbe kupitia simu ya mkononi wenye taarifa za afya na kukukumbusha siku ya kurudi kliniki. Nitakuuliza maswali machache kuhusu ujumbe wa kupitia simu ya mkononi

26. Utajisikiaje ukipata ujumbe mfupi wenye taarifa kuhusu saratani ya shingo ya kizazi na upimaji wake kwenye simu yako au ya familia yako? (Chagua tabasamu sahihi kuonyesha utakavyojisikia)

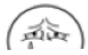

Siipendi kabisa

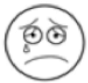

Siipendi

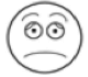

Sio sawa

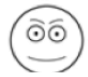

Sawa

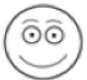

Naipenda

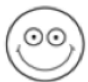

Naipenda sana

27. Utajisikiaje ukipata ujumbe mfupi wenye taarifa kuhusu saratani ya shingo ya kizazi na upimaji wake kwenye simu yako au ya familia yako? (Weka alama ya mstari wima kuonyesha utakavyojisikia).

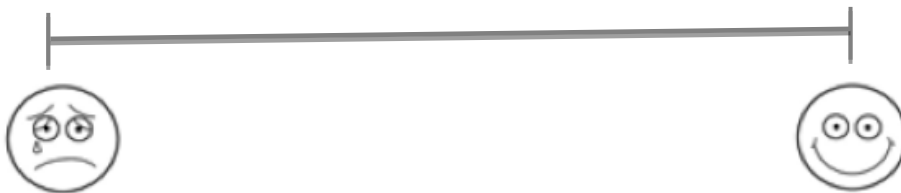

**Asante kwa ushiriki wako**

**Kama una maoni yoyote**

---

---

---
